# Supplementary material for: Personality traits in companion dogs—Results from the VIDOPET
Source: PubMed Central journal article supplement (PMC5892901; doi:10.1371/journal.pone.0195448), 2018-04-10
Supplement: pone.0195448.s001.pdf [file pone.0195448.s001.pdf]

**S1 Table. Variables from video coding that remained in the analysis.** E: experimenter, O: owner. Durations were calculated as percent of time.

| <b>Subtest</b>            | <b>Variable</b>    | <b>Definition</b>                                                                                                                                                                                                                                                                                                                                                                                  | <b>Type</b>          |
|---------------------------|--------------------|----------------------------------------------------------------------------------------------------------------------------------------------------------------------------------------------------------------------------------------------------------------------------------------------------------------------------------------------------------------------------------------------------|----------------------|
| Exploration               | Move               | Locomotion; any movement of the legs leading to a forward or backward motion.                                                                                                                                                                                                                                                                                                                      | duration             |
|                           | Explore            | Dog's nose is within 10 cm of the floor or any other surface (e.g., wall, table, objects) or dog has placed both front paws on an elevated surface (e.g., window sill, table). Does not include drinking or lying down.                                                                                                                                                                            | duration             |
|                           | 1m from O          | Dog's head is within 1m from O.                                                                                                                                                                                                                                                                                                                                                                    | duration             |
|                           | Look O             | The dog's head is oriented towards the owner (both when the dog is stationary and when moving).                                                                                                                                                                                                                                                                                                    | duration             |
|                           | Inactive           | Dog is standing, sitting, or lying in the room, without exploring according to the above definition; also included: transition from standing to sitting or from sitting to lying and scratching.                                                                                                                                                                                                   | duration             |
| Picture viewing           | Move independently | Moving independently from O (i.e. not moving in the direction of the owner or moving in the same direction as the owner in a proximity of 1m to the owner. Definition of 'move' as above.                                                                                                                                                                                                          | duration             |
|                           | Explore            | Dog's nose is within 10 cm of the floor or any other surface (e.g., wall, table, objects) or dog has placed both front paws on an elevated surface (e.g., window sill, table). Does not include drinking or lying down.                                                                                                                                                                            | duration             |
|                           | Owner 1m           | Dog's head is within 1m from O.                                                                                                                                                                                                                                                                                                                                                                    | duration             |
|                           | Look/follow O      | The dog's head is oriented towards O (both while the dog was stationary and when moving), or dog is following the moving O (moving while looking at O or walking behind/ next to O in the same direction as O).                                                                                                                                                                                    | duration             |
|                           | Inactive           | Dog is standing, sitting, or lying in the room, without exploring according to the above definition; also included: transition from standing to sitting or from sitting to lying and scratching.                                                                                                                                                                                                   | duration             |
| Greeting the experimenter | Approach E score   | When E approaches the dog and O, the dog 0: does not approach the experimenter; 1: approaches hesitatingly or after a while when called; 2: approaches immediately when called; 3: approaches immediately without calling.                                                                                                                                                                         | nominal              |
|                           | Greeting E score   | When E approaches the dog and O, the dog 0: does not approach E/ approaches initially but then shows avoidance behaviour; 1: approaches E but then behaves passively and does not elicit interaction, with or without tail wagging; 2: friendly greeting, tail wagging, may cuddle up, jump or lick; 3: very excited/ enthusiastic greeting with intensive searching for contact and tail wagging. | nominal              |
|                           | Tail wagging       | When E approaches the dog and O, the dog 0 shows no or very little tail wagging; 1: wags its tail intermittently; 2: wags its tail most of the time.                                                                                                                                                                                                                                               | nominal              |
| Food choice               | Change in bias     | % correct choices in Food Choice test 2 subtracted from % correct choices in Food Choice test 1.                                                                                                                                                                                                                                                                                                   | composite/continuous |
| Focus & Frustration test  | Oriented to Food   | Dog's head is facing in the direction of the object or E's hand (swinging the sausage).                                                                                                                                                                                                                                                                                                            | duration             |
|                           | Look E             | Dog's head is facing in the direction of the experimenter's face.                                                                                                                                                                                                                                                                                                                                  | duration             |
|                           | Snap               | Snapping at the food, grabbing with the mouth into the air (may or may not be accompanied by lunging).                                                                                                                                                                                                                                                                                             | frequency            |

| <b>Subtest</b>                  | <b>Variable</b>       | <b>Definition</b>                                                                                                                                                                                                                                                                                                                                                                  | <b>Type</b>             |
|---------------------------------|-----------------------|------------------------------------------------------------------------------------------------------------------------------------------------------------------------------------------------------------------------------------------------------------------------------------------------------------------------------------------------------------------------------------|-------------------------|
|                                 | Vocalise/<br>Stress   | Frequency of frustration/stress signals including yawning, lip licking, stretching, scratching/ grooming itself, shaking, or vocalisation.                                                                                                                                                                                                                                         | frequency               |
| Separation                      | Near door             | At least one foot of the dog is within 1 m of one of the exit doors (marked by a circle on the floor).                                                                                                                                                                                                                                                                             | composite/<br>duration  |
|                                 | Look at door          | Dog's head is oriented towards one of the doors while dog is stationary (sitting, lying, standing). Not coded when dog is "near door" (see above).                                                                                                                                                                                                                                 | composite/<br>duration  |
|                                 | Move                  | Locomotion; any movement of the legs leading to a forward or backward motion.                                                                                                                                                                                                                                                                                                      | duration                |
|                                 | Explore               | Dog's nose is within 10 cm of the floor or any other surface (e.g., wall, table, objects) or dog has placed both front paws on an elevated surface (e.g., window sill, table). Does not include drinking or lying down.                                                                                                                                                            | duration                |
|                                 | Inactive              | Dog is standing, sitting, or lying in the room, without exploring according to the above definition; also included: transition from standing to sitting or from sitting to lying and scratching.                                                                                                                                                                                   | duration                |
|                                 | Vocalise/<br>Stress   | Frequency of stress signals including yawning, lip licking, stretching, scratching/ groom itself, shaking, jumping at the door, scratching the door, and vocalization.                                                                                                                                                                                                             | composite/<br>frequency |
| Greeting<br>after<br>separation | Approach<br>latency E | After E's entry, latency of approaching E to within 20 cm.                                                                                                                                                                                                                                                                                                                         | latency                 |
|                                 | Approach E<br>score   | While E was standing next to door, the dog 0: did not approach E (to within 20 cm); 1: approached hesitatingly or after a while when called; 2: approached when called immediately; 3: approached immediately without calling.                                                                                                                                                     | nominal                 |
|                                 | Greeting E<br>score   | After E's entry, the dog 0: does not approach E/ approaches initially but then shows avoidance behaviour; 1: approaches E but then behaves passively and does not elicit interaction, with or without tail wagging; 2: friendly greeting, tail wagging, may cuddle up, jump or lick; 3: very excited/ enthusiastic greeting with intensive searching for contact and tail wagging. | nominal                 |
|                                 | Tail wagging<br>E     | While E is standing next to the door, the dog 0: shows no or very little tail wagging; 1: wags its tail intermittently; 2: wags its tail most of the time.                                                                                                                                                                                                                         | nominal                 |
|                                 | Play Intensity        | When the experimenter invited the dog to play, the dog 0: did not play; 1: mouthed the toy sometimes, but no real play or needed some encouragement; 2: mouthed the toy and sometimes pulled it/brought it back; 3: was very enthusiastic, played more than 90% of the time.                                                                                                       | nominal                 |
|                                 | Approach<br>latency O | Latency of approaching O after the separation test.                                                                                                                                                                                                                                                                                                                                | latency                 |
|                                 | Approach O<br>score   | 0: does not approach O/ approaches initially but then avoids O so no real interaction; 1: approaches O but shows little interest towards O, may behave passively after approaching, with or without tail wagging; 2: friendly greeting, tail wagging, may cuddle up, jump or lick; 3: very excited/ enthusiastic greeting with intensive searching for contact and tail wagging.   | nominal                 |

| <b>Subtest</b>           | <b>Variable</b>               | <b>Definition</b>                                                                                                                                                                                                                                                                                                                                                                  | <b>Type</b>            |
|--------------------------|-------------------------------|------------------------------------------------------------------------------------------------------------------------------------------------------------------------------------------------------------------------------------------------------------------------------------------------------------------------------------------------------------------------------------|------------------------|
|                          | Greeting O score              | After O's entry, the dog 0: does not approach O/ approaches initially but then shows avoidance behaviour; 1: approaches O but then behaves passively and does not elicit interaction, with or without tail wagging; 2: friendly greeting, tail wagging, may cuddle up, jump or lick; 3: very excited/ enthusiastic greeting with intensive searching for contact and tail wagging. | nominal                |
|                          | Tail wagging O                | While O is standing next to the door, the dog 0: shows no or very little tail wagging; 1: wags its tail intermittently; 2: wags its tail most of the time.                                                                                                                                                                                                                         | nominal                |
| Problem solving I (cage) | Success latency               | In Trial 1, the latency until the strap has been pulled out of the cage completely or the dog has otherwise obtained the sausage.                                                                                                                                                                                                                                                  | latency                |
|                          | Oriented to Cage              | Dog's nose or paw is within 10cm of cage and dog is shows an interest in the cage. e.g. sniffing trying to get the food, walking around it while oriented towards the cage. Does not include passively looking at the cage, even when physical contact with the cage is made.                                                                                                      | duration               |
|                          | Look O/ E                     | Looking at O or E, i.e. the dog's head is oriented towards O or E.                                                                                                                                                                                                                                                                                                                 | composite/<br>duration |
|                          | Owner 1m                      | Dog's head is within 1m from owner.                                                                                                                                                                                                                                                                                                                                                | duration               |
|                          | Vocalisation                  | Noise produced by vocal chords; barking, whining but not panting or breathing.                                                                                                                                                                                                                                                                                                     | frequency              |
|                          | Latency to give up            | Dog does not approach cage for 1min. (marker at the beginning of this period). Coded for the blocked trial if dog has obtained the reward in the first trial, coded for the first trial if dog has been unsuccessful in this trial.                                                                                                                                                | latency                |
| T-shirt                  | Inactive                      | After the t-shirt has been put on. Dog is standing, sitting, or lying in the room, without exploring according to the above definition; also included: transition from standing to sitting or from sitting to lying and scratching.                                                                                                                                                | duration               |
|                          | Look O                        | Looking at O, i.e. dog's head is oriented towards O while stationary; mutually exclusive with Follow O.                                                                                                                                                                                                                                                                            | duration               |
|                          | Follow O                      | Dog is following the moving O (moving while looking at O or walking behind/ next to O in the same direction as O).                                                                                                                                                                                                                                                                 | duration               |
|                          | Move independently            | Dog is moving independently from the owner.                                                                                                                                                                                                                                                                                                                                        | duration               |
| Obedience                | Mean latency to obey commands | The mean latency to obey the "sit" and "lay down" commands. The time from the first verbal or non-verbal command until the dog sat (rumps on the floor), or lay down completely (whole body on the floor).                                                                                                                                                                         | composite/<br>latency  |
|                          | Distract latency              | Latency from the sit command until the dog starts to move towards the distraction (even if the owner manages to call it back).                                                                                                                                                                                                                                                     | latency                |
|                          | Recall latency                | Latency to obey the O's recall during the distraction test (the time from the first verbal command until the dog is within 10 cm of the owner).                                                                                                                                                                                                                                    | latency                |
|                          | Mean recall latency           | At six time points during the test, the owner is asked to recall their off-lead dog. Mean latency to obey the "come" command, from the first verbal or non-verbal command until the dog makes the first movement towards the owner (and then actually comes to the owner). Missing data for many dogs – used only when latency data are available from at least two recalls.       | composite/<br>latency  |

| <b>Subtest</b>           | <b>Variable</b>               | <b>Definition</b>                                                                                                                                                                                                                                                                                                                                                                                                                                                                   | <b>Type</b>        |
|--------------------------|-------------------------------|-------------------------------------------------------------------------------------------------------------------------------------------------------------------------------------------------------------------------------------------------------------------------------------------------------------------------------------------------------------------------------------------------------------------------------------------------------------------------------------|--------------------|
|                          | Mean recall latency from cage | Mean latency to obey to the "come" command during the Cage test (1. after the dog ate the single piece of sausage in front of the cage; 2. after the dog ate the sausage from the strap). From the first verbal or non-verbal command until the dog makes the first movement towards the owner (and then actually comes to the owner).                                                                                                                                              | composite/ latency |
| Threatening approach     | Latency to aversive reaction  | Latency to the first 'aversive' (aggressive or avoidant) reaction to the threatening approach (except looking away) – i.e. moving away, hiding, barking, growling.                                                                                                                                                                                                                                                                                                                  | latency            |
|                          | Latency to friendly reaction  | Latency to first 'friendly' reaction to threatening approach – e.g. when the dog started tail wagging, and/ or moved towards the experimenter showing behaviours of appeasement.                                                                                                                                                                                                                                                                                                    | latency            |
|                          | Threat reaction               | Behaviour shown just before the test is terminated because either the experimenter has reached the dog or the dog has shown a strong reaction. 0: friendly, appeasing, i.e. approach E with tail wagging; 1: passive, i.e. no approach and no avoidance, may look away, and may wag tail intermittently; 2: avoidant, i.e. hid behind the owner/ moved away from the experimenter (with low tail and ear position); 3: aggressive, i.e. bark, growl, snap, and/ or lunge towards E. | nominal            |
|                          | Bark                          | During the threatening approach, the dog barks one or more times: 0: no; 1: yes.                                                                                                                                                                                                                                                                                                                                                                                                    | 1/0                |
|                          | Growl                         | During the threatening approach, the dog growls one or more times: 0: no; 1: yes.                                                                                                                                                                                                                                                                                                                                                                                                   | 1/0                |
|                          | Approach friendly             | During the threatening approach, the dog approaches E in a friendly, appeasing or submissive way (i.e. may wag the tail, with ears back, and/or invite play): 0: no; 1: yes.                                                                                                                                                                                                                                                                                                        | 1/0                |
|                          | Move off                      | During the threatening approach, the dog 0: does not move away from the approaching E; 1: moves away from the experimenter, but does not move behind O; 2: moves behind O.                                                                                                                                                                                                                                                                                                          | nominal            |
| Post-threat interaction  | Approach E score              | Dog's reaction when the experimenter turns sideways, crouches and calls the dog in a friendly voice after the threatening approach: 0: does not approach E within 5 seconds; 1: approaches hesitatingly or after a while when called; 2: approaches when called immediately; 3: approaches immediately without calling or has already approached in a friendly way during the threatening episode.                                                                                  | nominal            |
|                          | Interaction E score           | When E has crouched down post-threat, the dog 0: does not approach E/ approaches initially but then shows avoidance behaviour; 1: approaches E but then behaves passively and does not elicit interaction, with or without tail wagging; 2: friendly greeting, tail wagging, may cuddle up, jump or lick; 3: very excited/ enthusiastic greeting with intensive searching for contact and tail wagging.                                                                             | nominal            |
|                          | Tail wagging                  | When E has crouched down post-threat, the dog 0: shows no or very little tail wagging; 1: wags its tail intermittently; 2: wags its tail most of the time.                                                                                                                                                                                                                                                                                                                          | nominal            |
| Problem solving II (Bin) | Oriented to bin               | Dog's nose or paw is within 10cm of bin, dog is oriented towards bin.                                                                                                                                                                                                                                                                                                                                                                                                               | duration           |
|                          | Success latency               | Latency until the cover of the bin has been completely removed.                                                                                                                                                                                                                                                                                                                                                                                                                     | latency            |
| Novel object             | Owner 1m                      | Dog's head is within 1m from O.                                                                                                                                                                                                                                                                                                                                                                                                                                                     | duration           |
|                          | Toy 1m                        | Dog's head is within 1m from Toy. If dog is both near the toy and O or E, this is coded as Toy 1m.                                                                                                                                                                                                                                                                                                                                                                                  | duration           |

| <b>Subtest</b> | <b>Variable</b> | <b>Definition</b>                                                                                                                                                            | <b>Type</b> |
|----------------|-----------------|------------------------------------------------------------------------------------------------------------------------------------------------------------------------------|-------------|
|                | Look O          | The dog's head is oriented towards O.                                                                                                                                        | duration    |
|                | Look Toy        | The dog's head is oriented towards the toy.                                                                                                                                  | duration    |
|                | Look E          | The dog's head is oriented towards E.                                                                                                                                        | duration    |
| Ball play      | Follow ball     | Number of times the dog follows the thrown-away ball.                                                                                                                        | frequency   |
|                | Grab ball       | Number of times the dog grabs the thrown-away ball.                                                                                                                          | frequency   |
|                | Return          | Number of times the dog returns with the ball to within 1.5m of the owner within 5 seconds after first touching ball.                                                        | frequency   |
|                | Give out ball   | Number of times the dog gives the ball to the owner or drops it within 1.5 m of the owner within 5 seconds after first touching the ball.                                    | frequency   |
|                | Gaze alternate  | Frequency of gaze alternation (looking from the ball to the owner or from the owner to the ball) within 15 s after the ball has been placed on the window sill by the owner. | frequency   |
