# Supplementary material for: Personality traits in companion dogs—Results from the VIDOPET
Source: PubMed Central journal article supplement (PMC5892901; doi:10.1371/journal.pone.0195448), 2018-04-10
Supplement: pone.0195448.s002.pdf [file pone.0195448.s002.pdf]

**S2 Table. Variables used in the video rating.** The variables were rated on a Likert scale from 1 - 5 (“disagree strongly”, “tend to disagree”, “partly-partly”, “tend to agree”, “agree strongly”). E: experimenter, O: owner.

| <b>Subtest</b>            | <b>Variable</b>            | <b>Further explanation of variable</b>                |                                                        |
|---------------------------|----------------------------|-------------------------------------------------------|--------------------------------------------------------|
| Exploration               | Dependent                  | spends a lot of time near owner, takes up eye contact |                                                        |
|                           | Active                     |                                                       |                                                        |
|                           | Interested in surroundings |                                                       |                                                        |
|                           | Aroused, excited           |                                                       |                                                        |
| Picture                   | Dependent                  | spends a lot of time near owner, takes up eye contact |                                                        |
|                           | Active                     |                                                       |                                                        |
|                           | Confident                  |                                                       |                                                        |
|                           | Interested in surroundings |                                                       |                                                        |
|                           | Relaxed                    |                                                       |                                                        |
|                           | Aroused, excited           |                                                       |                                                        |
| Greeting the experimenter | Relaxed                    |                                                       |                                                        |
|                           | Aroused, excited           |                                                       |                                                        |
|                           | Interested in E            |                                                       |                                                        |
|                           | Passive                    |                                                       |                                                        |
|                           | Greeting intensity         |                                                       |                                                        |
| Food choice               | no variables coded         |                                                       |                                                        |
| Focus & Frustration test  | Active                     |                                                       |                                                        |
|                           | Focused                    |                                                       | is focussed on the sausage or the experimenter         |
|                           | Motivated                  |                                                       | tries many things to obtain the sausage                |
|                           | Relaxed                    |                                                       |                                                        |
|                           | Aroused, excited           |                                                       |                                                        |
|                           | Frustrated                 | e.g. barking, whining, stress signals                 |                                                        |
| Separation                | Active                     |                                                       |                                                        |
|                           | Relaxed                    |                                                       |                                                        |
|                           | Aroused, excited           |                                                       |                                                        |
|                           | Stressed, frustrated       |                                                       | e.g. barking, whining, stress signals, scratching door |
|                           | Focused on door(s)         |                                                       |                                                        |
| Greeting after separation | Relaxed E                  |                                                       |                                                        |
|                           | Aroused, excited E         |                                                       |                                                        |
|                           | Interested in E            |                                                       |                                                        |
|                           | Passive E                  |                                                       |                                                        |
|                           | Greeting intensity E       |                                                       |                                                        |
|                           | Relaxed O                  |                                                       |                                                        |
|                           | Aroused, excited O         |                                                       |                                                        |
|                           | Interested in O            |                                                       |                                                        |
|                           | Passive O                  |                                                       |                                                        |
|                           | Greeting intensity O       |                                                       |                                                        |
| Appease O                 |                            |                                                       |                                                        |
| Problem solving I (cage)  | Active                     |                                                       |                                                        |
|                           | Intensity of efforts       |                                                       |                                                        |
|                           | Focused on the sausage     |                                                       |                                                        |
|                           | Stressed, frustrated       |                                                       | e.g. barking, whining, stress signals                  |
|                           | Asks for help              |                                                       |                                                        |
| T-shirt                   | Relaxed                    |                                                       |                                                        |

| <b>Subtest</b>           | <b>Variable</b>         | <b>Further explanation of variable</b>                                                                           |
|--------------------------|-------------------------|------------------------------------------------------------------------------------------------------------------|
|                          | Passive                 |                                                                                                                  |
|                          | Insecure                |                                                                                                                  |
|                          | Stressed                |                                                                                                                  |
| Obedience                | Sit                     |                                                                                                                  |
|                          | Lay down                |                                                                                                                  |
|                          | Come                    |                                                                                                                  |
|                          | Stay                    |                                                                                                                  |
|                          | Distractible            |                                                                                                                  |
| Threatening approach     | Confident               |                                                                                                                  |
|                          | Appease                 |                                                                                                                  |
|                          | Alert                   | how quickly dog shows any behavioural reaction to the threat                                                     |
|                          | Watchful                | aims to maintain its individual distance, direct eye contact with experimenter, ears forward; high arousal level |
|                          | Offensive approach      | approaches in an agonistic way                                                                                   |
|                          | Defensive               | shows agonistic behaviour but from a distance                                                                    |
|                          | Avoidance behaviour     |                                                                                                                  |
| Post-threat interaction  | Friendly                | shows affiliative behaviour towards E                                                                            |
|                          | Relaxed                 |                                                                                                                  |
|                          | Aroused, excited        |                                                                                                                  |
|                          | Interested in E         |                                                                                                                  |
|                          | Passive                 |                                                                                                                  |
| Problem solving II (Bin) | Problem solving ability |                                                                                                                  |
|                          | Asks for help           |                                                                                                                  |
| Novel object             | Active                  |                                                                                                                  |
|                          | Confident               |                                                                                                                  |
|                          | Interested in object    |                                                                                                                  |
|                          | Insecure                |                                                                                                                  |
|                          | Dependent               |                                                                                                                  |
|                          | Careful                 |                                                                                                                  |
| Ball play                | Ball motivated          |                                                                                                                  |
|                          | Cooperation             | interest in playing with O                                                                                       |
|                          | Inviting to play        |                                                                                                                  |
|                          | Aroused, excited        |                                                                                                                  |
|                          | Playfulness             |                                                                                                                  |
