# Supplementary material for: Personality traits in companion dogs—Results from the VIDOPET
Source: PubMed Central journal article supplement (PMC5892901; doi:10.1371/journal.pone.0195448), 2018-04-10
Supplement: pone.0195448.s003.pdf [file pone.0195448.s003.pdf]

**S3 Table. The questionnaire used in the study (DPQ short form, Jones, 2008).** The questions were rated on a Likert scale from 1 - 5 (“disagree strongly”, “tend to disagree”, “partly-partly”, “tend to agree”, “agree strongly”), items marked with an asterisk were reverse coded. The internal consistency of factors calculated from the data of the present study are also shown.

|                                                                                                                             |                                |
|-----------------------------------------------------------------------------------------------------------------------------|--------------------------------|
| <b>Factor 1 – Fearfulness</b>                                                                                               | <b>Cronbach's alpha: 0.793</b> |
| <b>Facet 1 – Fear of People</b>                                                                                             |                                |
| 1* Dog is relaxed when greeting people.                                                                                     |                                |
| 6 Dog is shy.                                                                                                               |                                |
| 27 Dog behaves fearfully towards unfamiliar people.                                                                         |                                |
| <b>Facet 2 – Nonsocial Fear</b>                                                                                             |                                |
| 3 Dog is anxious.                                                                                                           |                                |
| 11* Dog is confident.                                                                                                       |                                |
| 22* Dog adapts easily to new situations and environments.                                                                   |                                |
| <b>Facet 3 – Fear of Dogs</b>                                                                                               |                                |
| 13 Dog avoids other dogs.                                                                                                   |                                |
| 21 Dog behaves submissively (e.g., rolls over, avoids eye contact, licks lips) when greeting other dogs.                    |                                |
| 42 Dog behaves fearfully towards other dogs.                                                                                |                                |
| <b>Facet 4 – Fear of Handling</b>                                                                                           |                                |
| 16 Dog behaves fearfully during visits to the veterinarian.                                                                 |                                |
| 35 Dog exhibits fearful behaviours when restrained.                                                                         |                                |
| 44 Dog behaves fearfully when groomed (e.g., nails trimmed, brushed, bathed, ears cleaned).                                 |                                |
| <b>Factor 2 – Aggression towards People</b>                                                                                 | <b>Cronbach's alpha: 0.707</b> |
| <b>Facet 1 – General Aggression</b>                                                                                         |                                |
| 7 Dog behaves aggressively towards unfamiliar people.                                                                       |                                |
| 18* Dog is friendly towards unfamiliar people.                                                                              |                                |
| 40 Dog shows aggression when nervous or fearful.                                                                            |                                |
| <b>Facet 2 – Situational Aggression</b>                                                                                     |                                |
| 25 Dog behaves aggressively in response to perceived threats from people (e.g., being cornered, having collar reached for). |                                |
| 30 Dog behaves aggressively during visits to the veterinarian.                                                              |                                |
| 36 Dog aggressively guards coveted items (e.g., stolen item, treats, food bowl).                                            |                                |
| <b>Factor 3 – Activity/Excitability</b>                                                                                     | <b>Cronbach's alpha: 0.683</b> |
| <b>Facet 1 – Excitability</b>                                                                                               |                                |
| 15 Dog is boisterous.                                                                                                       |                                |
| 31 Dog seeks constant activity.                                                                                             |                                |
| 41* Dog tends to be calm.                                                                                                   |                                |
| <b>Facet 2 – Playfulness</b>                                                                                                |                                |
| 9* Dog gets bored in play quickly.                                                                                          |                                |
| 17 Dog enjoys playing with toys.                                                                                            |                                |
| 33 Dog retrieves objects (e.g., balls, toys, sticks).                                                                       |                                |
| <b>Facet 3 – Active Engagement</b>                                                                                          |                                |
| 4* Dog is lethargic                                                                                                         |                                |
| 14 Dog works at tasks (e.g., getting treats out of a Kong, shredding toys) until entirely finished.                         |                                |
| 24 Dog is curious.                                                                                                          |                                |
| <b>Facet 4 – Companionability</b>                                                                                           |                                |
| 20 Dog seeks companionship from people.                                                                                     |                                |
| 26* Dog is aloof.                                                                                                           |                                |
| 37 Dog is affectionate.                                                                                                     |                                |
| <b>Factor 4 – Responsiveness to Training</b>                                                                                | <b>Cronbach's alpha: 0.646</b> |

---

**Facet 1 – Trainability**

- 29\* Dog is slow to respond to corrections.
- 38\* Dog ignores commands.
- 43 Dog is able to focus on a task in a distracting situation (e.g., loud or busy places, around other dogs).

---

**Facet 2 – Controllability**

- 5 When off leash, dog comes immediately when called.
- 10\* Dog is quick to sneak out through open doors, gates.
- 32 Dog leaves food or objects alone when told to do so.

---

**Factor 5 – Aggression towards Animals****Cronbach's alpha: 0.673**

---

**Facet 1 – Aggression towards Dogs**

- 2 Dog behaves aggressively toward dogs.
- 19\* Dog is playful with other dogs.
- 34\* Dog is friendly towards other dogs.

---

**Facet 2 – Prey Drive**

- 8 Dog likes to chase squirrels, birds, or other small animals.
- 23 Dog likes to chase bicycles, joggers, and skateboarders.
- 39 Dog behaves aggressively towards cats.

---

**Facet 3 – Dominance over other Dogs**

- 12 Dog is dominant over other dogs.
  - 28\* Dog willingly shares toys with other dogs.
  - 45 Dog is assertive or pushy with other dogs (e.g., if in a home with other dogs, when greeting).
-
