# Supplementary material for: Personality traits in companion dogs—Results from the VIDOPET
Source: PubMed Central journal article supplement (PMC5892901; doi:10.1371/journal.pone.0195448), 2018-04-10
Supplement: pone.0195448.s004.pdf [file pone.0195448.s004.pdf]

**S4 Table. Results of the subtest-level PCA analyses of the video coding.** For definition of the variables see S1 Table. E: experimenter, O: owner. Loadings > 0.4 are in bold.

*Exploration*

| <b>Variables</b>       | <b>Component</b> |
|------------------------|------------------|
| Move                   | <b>0.839</b>     |
| Explore                | <b>0.847</b>     |
| 1m from O              | <b>-0.619</b>    |
| Look O                 | <b>-0.787</b>    |
| Inactive               | <b>-0.927</b>    |
| Eigenvalue             | 3.284            |
| Explained variance (%) | 65.686           |

*Picture viewing*

| <b>Variables</b>       | <b>Component1</b> | <b>Component2</b> |
|------------------------|-------------------|-------------------|
| Move independently     | <b>0.886</b>      | -0.061            |
| Explore                | <b>0.885</b>      | -0.083            |
| Owner 1m               | -0.038            | <b>0.993</b>      |
| Look/ follow O         | <b>-0.812</b>     | 0.120             |
| Inactive               | <b>-0.902</b>     | -0.159            |
| Eigenvalue             | 3.049             | 1.029             |
| Explained variance (%) | 60.980            | 20.586            |

*Greeting the experimenter*

| <b>Variables</b>       | <b>Component</b> |
|------------------------|------------------|
| Approach E score       | <b>0.724</b>     |
| Greeting E score       | <b>0.873</b>     |
| Tail wagging           | <b>0.787</b>     |
| Eigenvalue             | 1.905            |
| Explained variance (%) | 63.488           |

*Food choice*

no PCA

*Focus & Frustration test*

| <b>Variables</b>       | <b>Component1</b> | <b>Component2</b> |
|------------------------|-------------------|-------------------|
| Oriented to Food       | <b>0.855</b>      | 0.198             |
| Look E                 | <b>-0.851</b>     | 0.050             |
| Snap                   | 0.322             | <b>0.681</b>      |
| Vocalise/ Stress       | -0.121            | <b>0.835</b>      |
| Eigenvalue             | 1.695             | 1.080             |
| Explained variance (%) | 42.378            | 27.003            |

*Separation*

| <b>Variables</b> | <b>Component1</b> | <b>Component2</b> |
|------------------|-------------------|-------------------|
|------------------|-------------------|-------------------|

|                        |               |               |
|------------------------|---------------|---------------|
| Near door              | -0.157        | <b>0.910</b>  |
| Look at door           | <b>-0.578</b> | <b>-0.691</b> |
| Move                   | <b>0.877</b>  | -0.066        |
| Explore                | <b>0.845</b>  | -0.217        |
| Inactive               | <b>-0.962</b> | 0.052         |
| Vocalise/ Stress       | -0.152        | <b>0.540</b>  |
| Eigenvalue             | 2.802         | 1.638         |
| Explained variance (%) | 46.698        | 27.307        |

*Greeting after separation*

| <b>Variables</b>       | <b>Component1</b> | <b>Component2</b> |
|------------------------|-------------------|-------------------|
| Approach latency E     | <b>-0.673</b>     | -0.196            |
| Approach E score       | <b>0.772</b>      | 0.162             |
| Greeting E score       | <b>0.792</b>      | 0.194             |
| Tail wagging           | <b>0.728</b>      | 0.115             |
| Play Intensity         | <b>0.549</b>      | <b>-0.452</b>     |
| Approach latency O     | -0.020            | <b>-0.762</b>     |
| Approach O score       | 0.106             | <b>0.787</b>      |
| Greeting O score       | 0.206             | <b>0.639</b>      |
| Tail wagging           | 0.304             | <b>0.483</b>      |
| Eigenvalue             | 3.077             | 1.736             |
| Explained variance (%) | 34.185            | 19.293            |

*Problem solving I (cage)*

| <b>Variables</b>       | <b>Component1</b> | <b>Component2</b> | <b>Component3</b> |
|------------------------|-------------------|-------------------|-------------------|
| Success latency        | -0.262            | <b>-0.732</b>     | -0.008            |
| Oriented to Cage       | <b>0.825</b>      | <b>0.400</b>      | -0.010            |
| Look O/ E              | <b>-0.848</b>     | 0.023             | 0.193             |
| Owner 1m               | 0.092             | <b>-0.803</b>     | 0.021             |
| Vocalisation           | -0.019            | -0.007            | <b>0.957</b>      |
| Latency to give up     | <b>0.748</b>      | -0.042            | <b>0.413</b>      |
| Eigenvalue             | 2.224             | 1.224             | 1.054             |
| Explained variance (%) | 37.072            | 20.393            | 17.568            |

*T-shirt*

| <b>Variables</b>       | <b>Component1</b> | <b>Component2</b> |
|------------------------|-------------------|-------------------|
| Inactive               | <b>0.947</b>      | -0.242            |
| Look O                 | <b>0.878</b>      | -0.327            |
| Follow O               | <b>-0.941</b>     | -0.300            |
| Move independently     | -0.268            | <b>0.955</b>      |
| Eigenvalue             | 2.774             | 1.019             |
| Explained variance (%) | 69.349            | 25.470            |

*Obedience*

| <b>Variables</b>              | <b>Component1</b> | <b>Component2</b> |
|-------------------------------|-------------------|-------------------|
| Mean latency to obey commands | <b>0.685</b>      | 0.074             |

|                               |              |               |
|-------------------------------|--------------|---------------|
| Distract latency              | 0.138        | <b>-0.702</b> |
| Recall latency                | 0.185        | <b>0.784</b>  |
| Mean recall latency           | <b>0.827</b> | -0.123        |
| Mean recall latency from cage | <b>0.586</b> | <b>0.488</b>  |
| Eigenvalue                    | 1.755        | 1.160         |
| Explained variance (%)        | 35.099       | 23.194        |

#### *Threatening approach*

| <b>Variables</b>             | <b>Component1</b> | <b>Component2</b> |
|------------------------------|-------------------|-------------------|
| Latency to aversive reaction | <b>-0.619</b>     | <b>-0.499</b>     |
| Latency to friendly reaction | 0.034             | <b>0.847</b>      |
| Threat reaction              | <b>0.780</b>      | <b>0.459</b>      |
| Bark                         | <b>0.906</b>      | 0.008             |
| Growl                        | <b>0.832</b>      | 0.104             |
| Approach friendly            | -0.275            | <b>-0.780</b>     |
| Move off                     | 0.117             | <b>0.623</b>      |
| Eigenvalue                   | 3.487             | 1.293             |
| Explained variance (%)       | 49.819            | 18.475            |

#### *Post-threat interaction*

| <b>Variables</b>       | <b>Component</b> |
|------------------------|------------------|
| Approach E score       | <b>0.633</b>     |
| Interaction E score    | <b>0.877</b>     |
| Tail wagging           | <b>0.828</b>     |
| Eigenvalue             | 1.856            |
| Explained variance (%) | 61.877           |

#### *Problem solving II (Bin)*

| <b>Variables</b>       | <b>Component</b> |
|------------------------|------------------|
| Oriented to bin        | <b>0.968</b>     |
| Success latency        | <b>-0.968</b>    |
| Eigenvalue             | 1.874            |
| Explained variance (%) | 93.690           |

#### *Novel object*

| <b>Variables</b>       | <b>Component1</b> | <b>Component2</b> |
|------------------------|-------------------|-------------------|
| Owner 1m               | 0.017             | <b>0.917</b>      |
| Toy 1m                 | 0.355             | <b>-0.805</b>     |
| Look O                 | <b>-0.739</b>     | 0.074             |
| Look Toy               | <b>0.940</b>      | -0.216            |
| Look E                 | <b>-0.713</b>     | 0.093             |
| Eigenvalue             | 2.455             | 1.161             |
| Explained variance (%) | 49.098            | 23.211            |

#### *Ball play*

| <b>Variables</b>       | <b>Component1</b> | <b>Component2</b> |
|------------------------|-------------------|-------------------|
| Follow ball            | <b>0.611</b>      | 0.144             |
| Grab ball              | <b>0.755</b>      | 0.128             |
| Return                 | <b>0.813</b>      | -0.022            |
| Give out ball          | <b>0.614</b>      | -0.290            |
| Gaze alternate         | 0.060             | <b>0.942</b>      |
| Eigenvalue             | 1.988             | 1.007             |
| Explained variance (%) | 39.757            | 20.140            |
