# Supplementary material for: Personality traits in companion dogs—Results from the VIDOPET
Source: PubMed Central journal article supplement (PMC5892901; doi:10.1371/journal.pone.0195448), 2018-04-10
Supplement: pone.0195448.s005.pdf [file pone.0195448.s005.pdf]

**S5 Table. Results of the subtest-level PCA analyses of the video rating.** E: experimenter, O: owner. Loadings > 0.4 are in bold.

*Exploration*

| <b>Variables</b>           | <b>Component</b> |
|----------------------------|------------------|
| Dependent                  | <b>-0.800</b>    |
| Active                     | <b>0.892</b>     |
| Interested in surroundings | <b>0.911</b>     |
| Aroused, excited           | <b>0.537</b>     |
| Eigenvalue                 | 2.553            |
| Explained variance (%)     | 63.828           |

*Picture viewing*

| <b>Variables</b>           | <b>Component1</b> | <b>Component2</b> |
|----------------------------|-------------------|-------------------|
| Dependent                  | <b>-0.421</b>     | -0.272            |
| Active                     | <b>0.905</b>      | 0.013             |
| Confident                  | 0.253             | <b>0.735</b>      |
| Interested in surroundings | <b>0.845</b>      | 0.306             |
| Relaxed                    | -0.098            | <b>0.882</b>      |
| Aroused, excited           | <b>0.741</b>      | <b>-0.414</b>     |
| Eigenvalue                 | 2.378             | 1.613             |
| Explained variance (%)     | 39.637            | 26.876            |

*Greeting the experimenter*

| <b>Variables</b>       | <b>Component1</b> | <b>Component2</b> |
|------------------------|-------------------|-------------------|
| Relaxed                | -0.110            | <b>0.932</b>      |
| Aroused, excited       | <b>0.867</b>      | -0.032            |
| Interested in E        | <b>0.561</b>      | <b>0.696</b>      |
| Passive                | <b>-0.888</b>     | -0.029            |
| Greeting intensity     | <b>0.886</b>      | 0.202             |
| Eigenvalue             | 2.805             | 1.243             |
| Explained variance (%) | 56.090            | 24.853            |

*Food choice*

No video rating

*Focus & Frustration test*

| <b>Variables</b>       | <b>Component1</b> | <b>Component2</b> |
|------------------------|-------------------|-------------------|
| Active                 | <b>0.895</b>      | -0.114            |
| Focused                | <b>0.508</b>      | <b>0.653</b>      |
| Motivated              | <b>0.909</b>      | -0.068            |
| Relaxed                | <b>-0.519</b>     | <b>0.753</b>      |
| Aroused, excited       | <b>0.772</b>      | -0.331            |
| Frustrated             | 0.258             | <b>-0.754</b>     |
| Eigenvalue             | 3.154             | 1.361             |
| Explained variance (%) | 52.565            | 22.681            |

*Separation*

| <b>Variables</b>       | <b>Component1</b> | <b>Component2</b> |
|------------------------|-------------------|-------------------|
| Active                 | 0.312             | <b>0.860</b>      |
| Relaxed                | <b>-0.930</b>     | -0.006            |
| Aroused, excited       | <b>0.719</b>      | 0.358             |
| Stressed, frustrated   | <b>0.899</b>      | -0.119            |
| Focused on door(s)     | 0.196             | <b>-0.874</b>     |
| Eigenvalue             | 2.411             | 1.561             |
| Explained variance (%) | 48.212            | 31.221            |

*Greeting after separation*

| <b>Variables</b>       | <b>Component1</b> | <b>Component2</b> | <b>Component3</b> |
|------------------------|-------------------|-------------------|-------------------|
| Relaxed E              | -0.147            | <b>0.551</b>      | <b>0.615</b>      |
| Aroused, excited E     | 0.228             | <b>0.407</b>      | <b>-0.650</b>     |
| Interested in E        | -0.014            | <b>0.917</b>      | 0.081             |
| Passive E              | -0.264            | <b>-0.642</b>     | 0.334             |
| Greeting intensity E   | 0.191             | <b>0.868</b>      | -0.120            |
| Relaxed O              | <b>0.451</b>      | -0.084            | <b>0.706</b>      |
| Aroused, excited O     | <b>0.522</b>      | 0.063             | <b>-0.547</b>     |
| Interested in O        | <b>0.645</b>      | 0.123             | 0.313             |
| Passive O              | <b>-0.831</b>     | -0.118            | 0.364             |
| Greeting intensity O   | <b>0.869</b>      | 0.052             | -0.004            |
| Appease O              | <b>-0.540</b>     | -0.085            | 0.080             |
| Eigenvalue             | 3.473             | 2.067             | 1.760             |
| Explained variance (%) | 31.574            | 18.791            | 16.004            |

*Problem solving I (cage)*

| <b>Variables</b>       | <b>Component1</b> | <b>Component2</b> |
|------------------------|-------------------|-------------------|
| Active                 | <b>0.616</b>      | -0.351            |
| Intensity of efforts   | <b>0.875</b>      | 0.121             |
| Focused on the sausage | <b>0.844</b>      | 0.223             |
| Stressed, frustrated   | 0.075             | <b>0.926</b>      |
| Asks for help          | <b>-0.861</b>     | 0.051             |
| Eigenvalue             | 2.611             | 1,041             |
| Explained variance (%) | 52.222            | 20.827            |

*T-shirt*

| <b>Variables</b>       | <b>Component1</b> | <b>Component2</b> |
|------------------------|-------------------|-------------------|
| Relaxed                | <b>0.869</b>      | 0.245             |
| Passive                | -0.234            | <b>0.801</b>      |
| Insecure               | <b>-0.852</b>     | 0.195             |
| Stressed               | -0.369            | <b>-0.740</b>     |
| Eigenvalue             | 1.713             | 1.246             |
| Explained variance (%) | 42.831            | 31.150            |

*Obedience*

| <b>Variables</b> | <b>Component1</b> | <b>Component2</b> | <b>Component3</b> |
|------------------|-------------------|-------------------|-------------------|
|------------------|-------------------|-------------------|-------------------|

|                        |               |               |               |
|------------------------|---------------|---------------|---------------|
| Sit                    | <b>0.863</b>  | 0.294         | 0.013         |
| Lay down               | -0.064        | <b>-0.844</b> | 0.109         |
| Come                   | 0.246         | <b>-0.575</b> | <b>-0.599</b> |
| Stay                   | 0.086         | -0.147        | <b>0.909</b>  |
| Distractible           | <b>-0.820</b> | <b>0.414</b>  | 0.013         |
| Eigenvalue             | 1.650         | 1.247         | 1.112         |
| Explained variance (%) | 32.991        | 24.944        | 22.235        |

*Threatening approach*

| <b>Variables</b>       | <b>Component1</b> | <b>Component2</b> |
|------------------------|-------------------|-------------------|
| Confident              | <b>-0.612</b>     | 0.202             |
| Appease                | 0.013             | <b>-0.417</b>     |
| Alert                  | <b>0.738</b>      | 0.394             |
| Watchful               | <b>0.441</b>      | <b>0.821</b>      |
| Offensive (approaches) | -0.105            | <b>0.640</b>      |
| Defensive              | <b>0.851</b>      | 0.047             |
| Avoidance behaviour    | <b>0.549</b>      | <b>-0.553</b>     |
| Eigenvalue             | 2.231             | 1.682             |
| Explained variance (%) | 31.869            | 24.032            |

*Post-threat interaction*

| <b>Variables</b>       | <b>Component1</b> | <b>Component2</b> |
|------------------------|-------------------|-------------------|
| Friendly               | <b>0.637</b>      | <b>0.698</b>      |
| Relaxed                | -0.206            | <b>0.897</b>      |
| Aroused, excited       | <b>0.882</b>      | 0.014             |
| Interested in E        | <b>0.611</b>      | <b>0.693</b>      |
| Passive                | <b>-0.874</b>     | -0.037            |
| Eigenvalue             | 2.854             | 1.283             |
| Explained variance (%) | 57.076            | 25.662            |

*Problem solving II (Bin)*

| <b>Variables</b>        | <b>Component</b> |
|-------------------------|------------------|
| Problem solving ability | <b>0.957</b>     |
| Asks for help           | <b>-0.957</b>    |
| Eigenvalue              | 1.832            |
| Explained variance (%)  | 91.613           |

*Novel object*

| <b>Variables</b>       | <b>Component1</b> | <b>Component2</b> |
|------------------------|-------------------|-------------------|
| Active                 | <b>0.744</b>      | -0.067            |
| Confident              | 0.186             | <b>-0.938</b>     |
| Interested in object   | <b>0.756</b>      | 0.082             |
| Insecure               | 0.004             | <b>0.957</b>      |
| Dependent              | <b>-0.822</b>     | 0.139             |
| Careful                | <b>-0.532</b>     | 0.296             |
| Eigenvalue             | 2.459             | 1.575             |
| Explained variance (%) | 40.988            | 26.243            |

*Ball play*

| <b>Variables</b>       | <b>Component1</b> | <b>Component2</b> |
|------------------------|-------------------|-------------------|
| Ball motivated         | <b>0.844</b>      | 0.310             |
| Cooperation            | 0.194             | <b>0.800</b>      |
| Inviting to play       | 0.025             | <b>0.858</b>      |
| Aroused, excited       | <b>0.687</b>      | -0.138            |
| Playfulness            | <b>0.876</b>      | 0.312             |
| Eigenvalue             | 2.438             | 1.140             |
| Explained variance (%) | 48.761            | 22.802            |
